# Supplementary material
Source: publisher site journal article supplement (http://www.kjim.org/upload/media/kjim-2019-097-suppl.pdf)
Supplement: Supplementary file 1 [file kjim-2019-097-suppl.pdf]

**Supplementary Table 1. General characteristics of study population**

| Characteristic                              | Value             |
|---------------------------------------------|-------------------|
| Age, yr                                     | 76.0 ± 3.9        |
| Male sex                                    | 1,397 (47.6)      |
| Body mass index, kg/m <sup>2</sup>          | 24.5 ± 3          |
| Alcohol, yes                                | 535 (18.2)        |
| Smoking, yes                                | 1,792 (61)        |
| Physical activity, kcal, mean               | 3,345.5 ± 4,096.3 |
| Education, > 6 yr                           | 2,322 (79.1)      |
| Spouse, yes                                 | 1,973 (67.3)      |
| Polypharmacy                                | 688 (23.4)        |
| No. of chronic diseases                     | 2.4 ± 1.7         |
| <b>Current illness</b>                      |                   |
| Hypertension                                | 1,702 (58.0)      |
| Diabetes                                    | 651 (22.2)        |
| Cancer                                      | 46 (1.6)          |
| Myocardial infarction                       | 66 (2.2)          |
| Congestive heart failure                    | 20 (0.7)          |
| Angina                                      | 182 (6.2)         |
| Asthma                                      | 100 (3.4)         |
| Chronic obstructive pulmonary disease       | 31 (1.1)          |
| Chronic bronchitis                          | 45 (1.5)          |
| Emphysema                                   | 7 (0.2)           |
| Arthritis                                   | 787 (26.8)        |
| Osteoarthritis                              | 743 (25.3)        |
| Rheumatoid arthritis                        | 60 (2.0)          |
| Stroke                                      | 143 (4.9)         |
| Kidney disease <sup>a</sup>                 | 46 (1.6)          |
| Urinary incontinence                        | 113 (3.8)         |
| Heart disease <sup>b</sup>                  | 257 (8.8)         |
| Lung disease <sup>c</sup>                   | 172 (5.9)         |
| Osteoporosis                                | 476 (16.2)        |
| Liver disease <sup>d</sup>                  | 42 (1.4)          |
| Depression                                  | 76 (2.6)          |
| eGFR < 60 mL/min/1.73 m <sup>2</sup>        | 453 (15.4)        |
| Geriatric Depression Scale (short-form) ≥ 6 | 651 (22.2)        |
| <b>Frailty phenotype</b>                    |                   |
| Robust                                      | 1,324 (45.1)      |
| Pre-frail                                   | 1,364 (46.5)      |
| Frail                                       | 248 (8.4)         |

Values are presented as mean ± SD or number (%).

eGFR, estimated glomerular filtration rate.

<sup>a</sup>Kidney disease: includes chronic kidney disease, chronic renal failure, (excluding urinary stones).

<sup>b</sup>Heart disease: includes myocardial infarction, angina, and congestive heart failure.

<sup>c</sup>Lung disease: includes asthma, chronic obstructive pulmonary disease, chronic bronchitis, and emphysema.

<sup>d</sup>Liver disease: includes moderate or severe liver disease (concomitant esophageal varix, hepatic failure, toxic hepatitis, portal hypertension, and hepatorenal syndrome).
